# Supplementary material for: Precipitation reconstructions for Paris based on the observations of Louis Morin, 1665–1713 CE
Source: Copernicus journal article supplement (doi:10.5194/egusphere-2022-1445), 2023-01-16
Supplement: Supplementary file [file egusphere-2022-1445-AC2-supplement.pdf]

We thank Prof. Macdonald for the positive assessment and the minor comments made on our study. In the following response, the italics indicate Prof. Macdonald's comments, and the remaining text indicates our response letter.

*This is a well written and detailed paper exploring the diaries and records of Louis Morin, Paris (1665-1713). The paper provides a detailed analysis, which is sound and robust, in places additional detail would enable the reader to develop a more detailed understanding of Morin and his intentions, but the analysis is good. Some minor improvements in clarity or expression may be achieved and an annotated copy of the manuscript is attached to help the authors undertake these changes. I have also flagged in a couple of places sections where I felt the arguments presented warranted reflection and were other works could be used to support arguments.*

We will consider all suggested minor revisions for improvement, which are explicitly stated in the attached file, in the revised paper.

*You might consider comparing the snow series information presented to that from the Manley snow series for London, a rare comparable record for the period.*

Thank you for this valuable advice. We will provide a comparison between the Manley snow series and that of Morin.

Please note that we make **additional adjustments**:

- a) Change of the title to: "Precipitation reconstructions for Paris based on the observations by Louis Morin, 1665–1713 CE
- b) Slightly different result for DJF in Fig. 10.
- c) Slightly different result in Fig. A2.
- d) Additional sentence in the Data section stating that we have been given access to the manuscript and copies of the manuscript by the University of Bern and the Institut de France.

Best regards,

The authors
